# Supplementary material for: Targetting an LncRNA P5848-ENO1 axis inhibits tumor growth in hepatocellular carcinoma
Source: PubMed Central journal article supplement (PMC6859111; doi:10.1042/bsr20180896), 2019-11-15
Supplement: BSR-2018-0896_supp.pdf [file BSR-2018-0896_supp.pdf]

Supplementary Table 1 The antibodies list

| <b>Antibody</b> | <b>Manufacturers</b> | <b>CAT.NO</b> |
|-----------------|----------------------|---------------|
| ENO1            | Abcam,USA            | ab155102      |
| Bax             | Proteintech,China    | 50599-2-Ig    |
| Bcl2            | Proteintech,China    | 12789-1-AP    |
| Claved-Caspase3 | CST,USA              | #2699         |
| $\beta$ -actin  | CST,USA              | #3700         |
